# Supplementary material
Source: Research Square preprint supplement (doi:10.21203/rs.3.rs-9656672/v1)

## Analysis\_Resources

| Variable                                                                                                                                                                                                                                                                                                                                                                                                                                                                                                                                                                                                                                                                                                                                                                                                                                                                                                                                                                                                                                                                                                                                                                                                                                                  | Code Values                                                                                |
|-----------------------------------------------------------------------------------------------------------------------------------------------------------------------------------------------------------------------------------------------------------------------------------------------------------------------------------------------------------------------------------------------------------------------------------------------------------------------------------------------------------------------------------------------------------------------------------------------------------------------------------------------------------------------------------------------------------------------------------------------------------------------------------------------------------------------------------------------------------------------------------------------------------------------------------------------------------------------------------------------------------------------------------------------------------------------------------------------------------------------------------------------------------------------------------------------------------------------------------------------------------|--------------------------------------------------------------------------------------------|
| Gender                                                                                                                                                                                                                                                                                                                                                                                                                                                                                                                                                                                                                                                                                                                                                                                                                                                                                                                                                                                                                                                                                                                                                                                                                                                    | 1=Male,<br>2= Female                                                                       |
| Prof.                                                                                                                                                                                                                                                                                                                                                                                                                                                                                                                                                                                                                                                                                                                                                                                                                                                                                                                                                                                                                                                                                                                                                                                                                                                     | 1=Junior,<br>2=Intermediate,<br>3=Senior                                                   |
| Age                                                                                                                                                                                                                                                                                                                                                                                                                                                                                                                                                                                                                                                                                                                                                                                                                                                                                                                                                                                                                                                                                                                                                                                                                                                       | 1=Under 30,<br>2=31~40,<br>3=41~50,<br>4=Over 51                                           |
| Sub.                                                                                                                                                                                                                                                                                                                                                                                                                                                                                                                                                                                                                                                                                                                                                                                                                                                                                                                                                                                                                                                                                                                                                                                                                                                      | 1=Arts,<br>2=Science                                                                       |
| Degree                                                                                                                                                                                                                                                                                                                                                                                                                                                                                                                                                                                                                                                                                                                                                                                                                                                                                                                                                                                                                                                                                                                                                                                                                                                    | 1=Associate & below,<br>2= Bachelor,<br>3= Postgraduate                                    |
| Exp.                                                                                                                                                                                                                                                                                                                                                                                                                                                                                                                                                                                                                                                                                                                                                                                                                                                                                                                                                                                                                                                                                                                                                                                                                                                      | 1=Under 5,<br>2=6~15,<br>3=16~25,<br>4=Over 26,                                            |
| <p>Artificial Intelligence Literacy:</p> <ol style="list-style-type: none"> <li>1. I am able to explain what Machine Learning is to others.</li> <li>2. I understand that the quality of training data directly affects the output of an AI system.</li> <li>3. I know how to prepare and organize data for training AI models.</li> <li>4. I know how to ask questions or give instructions to AI (i.e., design prompts) to obtain more accurate and useful results.</li> <li>5. I am able to effectively evaluate AI-generated answers or content and judge whether they are reliable.</li> <li>6. I am skilled at integrating AI tools into my workflow to improve efficiency.</li> <li>7. I can identify which real-world problems are suitable for being solved with AI.</li> <li>8. I understand the current capabilities and limitations of AI technology (e.g., it may produce bias or misinformation).</li> <li>9. I am able to critically think about the social impacts of AI solutions (e.g., effects on employment and privacy).</li> <li>10. I understand that AI systems may have algorithmic bias, which can lead to unfair outcomes for specific groups.</li> <li>11. I pay attention to protecting personal privacy and data</li> </ol> | <p>1=Strongly disagree<br/>2=Disagree<br/>3=Undecided<br/>4=Agree<br/>5=Strongly agree</p> |

|                                                                                                                                                                                                                                                                                                                                                                                                                                                                                                                                                                                                                                                                                                                                                                                                                                                                                                                                                                                                                                                                                                                       |                                                                                                        |
|-----------------------------------------------------------------------------------------------------------------------------------------------------------------------------------------------------------------------------------------------------------------------------------------------------------------------------------------------------------------------------------------------------------------------------------------------------------------------------------------------------------------------------------------------------------------------------------------------------------------------------------------------------------------------------------------------------------------------------------------------------------------------------------------------------------------------------------------------------------------------------------------------------------------------------------------------------------------------------------------------------------------------------------------------------------------------------------------------------------------------|--------------------------------------------------------------------------------------------------------|
| <p>security when using AI tools.</p> <p>12. I am able to reflect on the ethical and copyright issues involved in using AI-generated content (e.g., text, images).</p>                                                                                                                                                                                                                                                                                                                                                                                                                                                                                                                                                                                                                                                                                                                                                                                                                                                                                                                                                 |                                                                                                        |
| <p>Online Prosocial Behavior:</p> <p>1. How often do you reply to an email from someone you know who seeks help or information.</p> <p>2. How often do you forward a petition on the Internet.</p> <p>3. How often do you answer questions that people put on Internet forums or mailing lists.</p> <p>4. How often do you report or comment on someone's behavior on the Internet.</p> <p>5. How often do you provide information and help to people you do not know on MSN / Yahoo Messenger etc.</p> <p>6. How often do you send emails to five or more email addresses to point out something useful.</p> <p>7. How often do you forward an email that you feel would be of help to others for their work, education, health or family How often do you contribute to Wikipedia or a similar site.</p> <p>8. How long have you contributed to Wikipedia or similar websites.</p> <p>9. How often do you willingly fill out questionnaires / surveys on the Internet so as to help other people or organizations.</p> <p>10. How often do you forward an email from someone that asks for help or information.</p> | <p>1=Never</p> <p>2=Rarely</p> <p>3=Sometimes</p> <p>4=Often</p> <p>5=Always</p>                       |
| <p>Teaching Innovation Behavior:</p> <p>1. I pay attention to my students' learning needs.</p> <p>2. I systematically search for new methods, techniques, or work instruments.</p> <p>3. I critically examine my practice to see how I can improve it.</p> <p>4. I imagine original solutions to the problems I encounter in my work.</p> <p>5. I design novel activities to promote my students' learning.</p> <p>6. I think of new strategies to teach the content.</p> <p>7. I convince colleagues, administrators, supervisors, etc. of the importance of my proposals.</p> <p>8. I try to gain approval for my ideas.</p> <p>9. I obtain the necessary resources to put my ideas into practice.</p> <p>10. I systematically modify my teaching strategies to achieve better results.</p> <p>11. I incorporate varied and novel resources to develop the content.</p> <p>12. I implement original activities to enhance learning.</p>                                                                                                                                                                             | <p>1=Strongly disagree</p> <p>2=Disagree</p> <p>3=Undecided</p> <p>4=Agree</p> <p>5=Strongly agree</p> |
| <p>Technological Self-efficacy:</p> <p>1. I possess the knowledge necessary to use technology.</p>                                                                                                                                                                                                                                                                                                                                                                                                                                                                                                                                                                                                                                                                                                                                                                                                                                                                                                                                                                                                                    | <p>1=Strongly disagree</p> <p>2=Disagree</p>                                                           |

|                                                                                                                                                                                                                                                                                                                                                                                                                                                                                                                                                                                                                                           |                                                                                                        |
|-------------------------------------------------------------------------------------------------------------------------------------------------------------------------------------------------------------------------------------------------------------------------------------------------------------------------------------------------------------------------------------------------------------------------------------------------------------------------------------------------------------------------------------------------------------------------------------------------------------------------------------------|--------------------------------------------------------------------------------------------------------|
| <p>2. When encountering technical problems, I am confident that I can solve them on my own.</p> <p>3. I can successfully use a new technology if I only have the manual or online help for reference.</p> <p>4. I trust my own technical operational abilities.</p>                                                                                                                                                                                                                                                                                                                                                                       | <p>3=Undecided</p> <p>4=Agree</p> <p>5=Strongly agree</p>                                              |
| <p>Teaching anxiety:</p> <p>1. My palms start to sweat if I have to do a difficult problem in my teaching subject.</p> <p>2. I would start to panic if I had to solve challenging teaching problems.</p> <p>3. My mind goes blank when I am about to start a challenging teaching problem.</p> <p>4. Feelings of anxiety interfere with my ability to solve teaching problems.</p> <p>5. I get nervous when I think my teaching ability is being evaluated.</p> <p>6. I would feel uncomfortable if another teacher observed me teaching lesson.</p>                                                                                      | <p>1=Strongly disagree</p> <p>2=Disagree</p> <p>3=Undecided</p> <p>4=Agree</p> <p>5=Strongly agree</p> |
| <p>Subjective Workload:</p> <p>1. I have enough time to complete all the tasks.</p> <p>2. The pace of the tasks makes me feel pressed for time.</p> <p>3. I need to make decisions within a very limited time.</p> <p>4. The cognitive demands of the tasks are high.</p> <p>5. I need to handle multiple tasks/sources of information at the same time.</p> <p>6. The demands of the tasks exceed my capabilities.</p> <p>7. I need to put in a great deal of effort to complete the tasks.</p> <p>8. To maintain my performance level, I have to work much harder.</p> <p>9. The job demands are too high to maintain the standard.</p> | <p>1=Strongly disagree</p> <p>2=Disagree</p> <p>3=Undecided</p> <p>4=Agree</p> <p>5=Strongly agree</p> |

APSSAU:

<https://spssau.com/indexs.html>

Q 搜索方法

最近使用

通用方法

- 频数
- 分类汇总
- 描述
- 交叉(卡方)
- 相关
- 线性回归
- 方差
- 独立t检验
- 单样本检验
- 配对t检验
- 正态性检验
- 非参数检验

问卷研究

- 信度
- 效度
- 多选题
- 单选-多选
- 多选-单选
- 多选-多选
- 项目分析
- 权重
- 验证性因子分析
- 对应分析
- 路径分析
- 结构方程模型 SEM
- 调节作用
- 中介作用
- 调节中介
- KANO模型
- NPS
- PSM
- rwg
- 联合分析
- Turf组合模型
- 内容效度

可视化

数据处理

进阶方法

调节作用 1218

调节作用 1217

调节作用 1215

筛选样本 449

查看数据

开始分析

Gender  
Prof.  
Age  
Sub.  
Degree  
Exp.  
AIL1  
AIL2  
AIL3  
AIL4  
AIL5  
AIL6  
AIL7  
AIL8  
AIL9  
AIL10  
AIL11  
AIL12  
OPB1  
OPB2  
OPB3  
OPB4  
OPB5  
OPB6  
OPB7  
OPB8  
OPB9  
OPB10

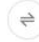

Supplement: Supplementary file 1 [file 44cbb5c605a0f2884a1b020b.pdf]
